# Supplementary material for: A root functional–structural model allows assessment of the effects of water deficit on water and solute transport parameters
Source: PubMed Central journal article supplement (PMC10010609; doi:10.1093/jxb/erac471), 2022-12-14
Supplement: erac471_suppl_supplementary_figures_s1-s8_protocols_s1-s2.pdf [file erac471_suppl_supplementary_figures_s1-s8_protocols_s1-s2.pdf]

## Supplementary Figures

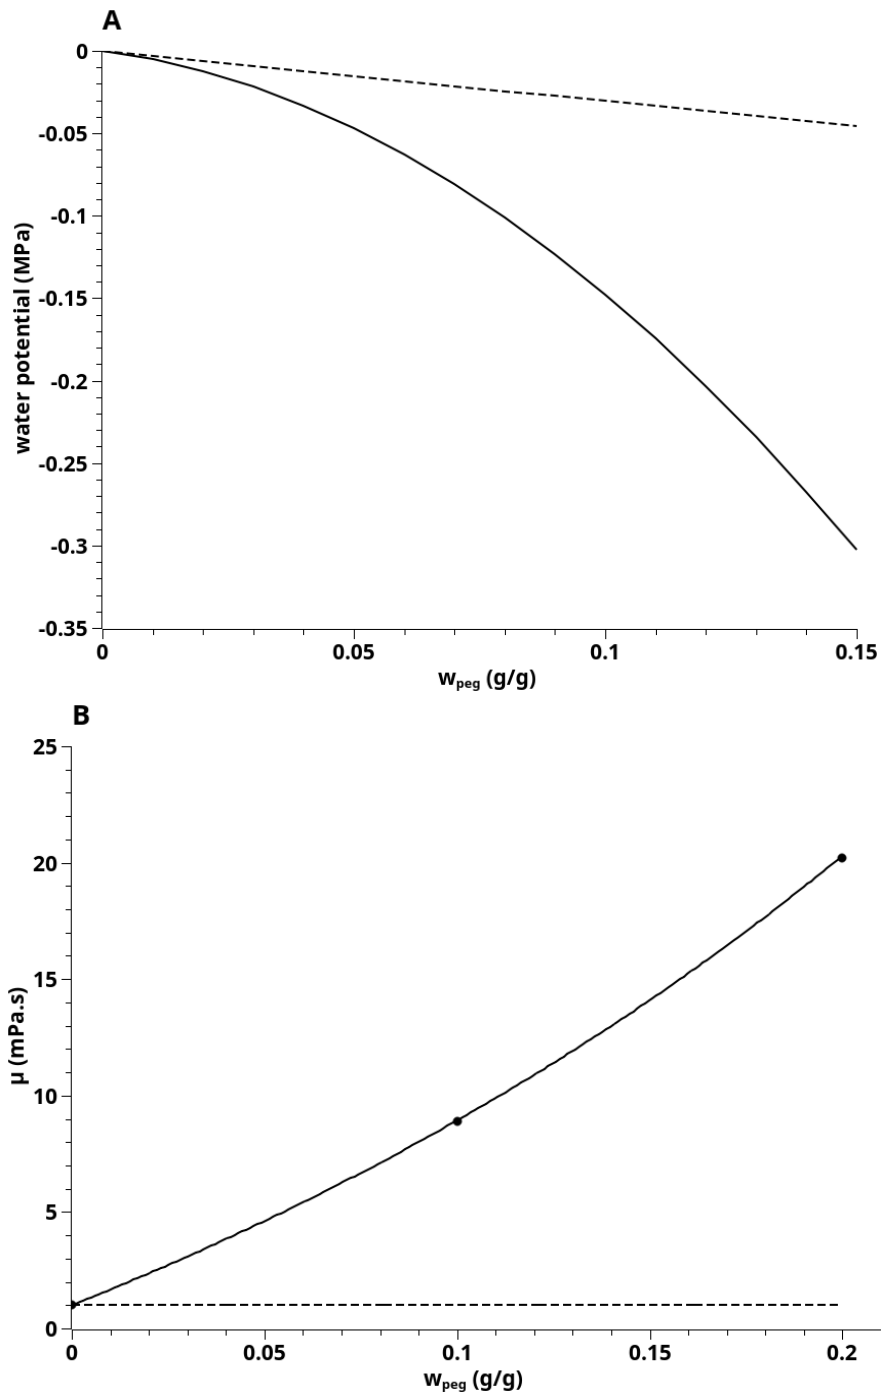

**Supplementary Fig. S1:** Physicochemical characteristics of PEG 8000 solutions. (A) water potential as a function of PEG concentration ( $w_{\text{peg}}$ ) at 25 °C. The solid line represents the water potential according to equation 1 in (Michel, 1983). The dashed line was derived by calculation using the Van't Hoff's law. (B) viscosity pressure of PEG 8000 solutions as a function of PEG concentration ( $w_{\text{peg}}$ ) at 25 °C. The solid line represents an exponential fit of data (dots) from (Gonzalez-Tello *et al.*, 1994). The dashed line indicates the water viscosity. See Materials and Methods for details.

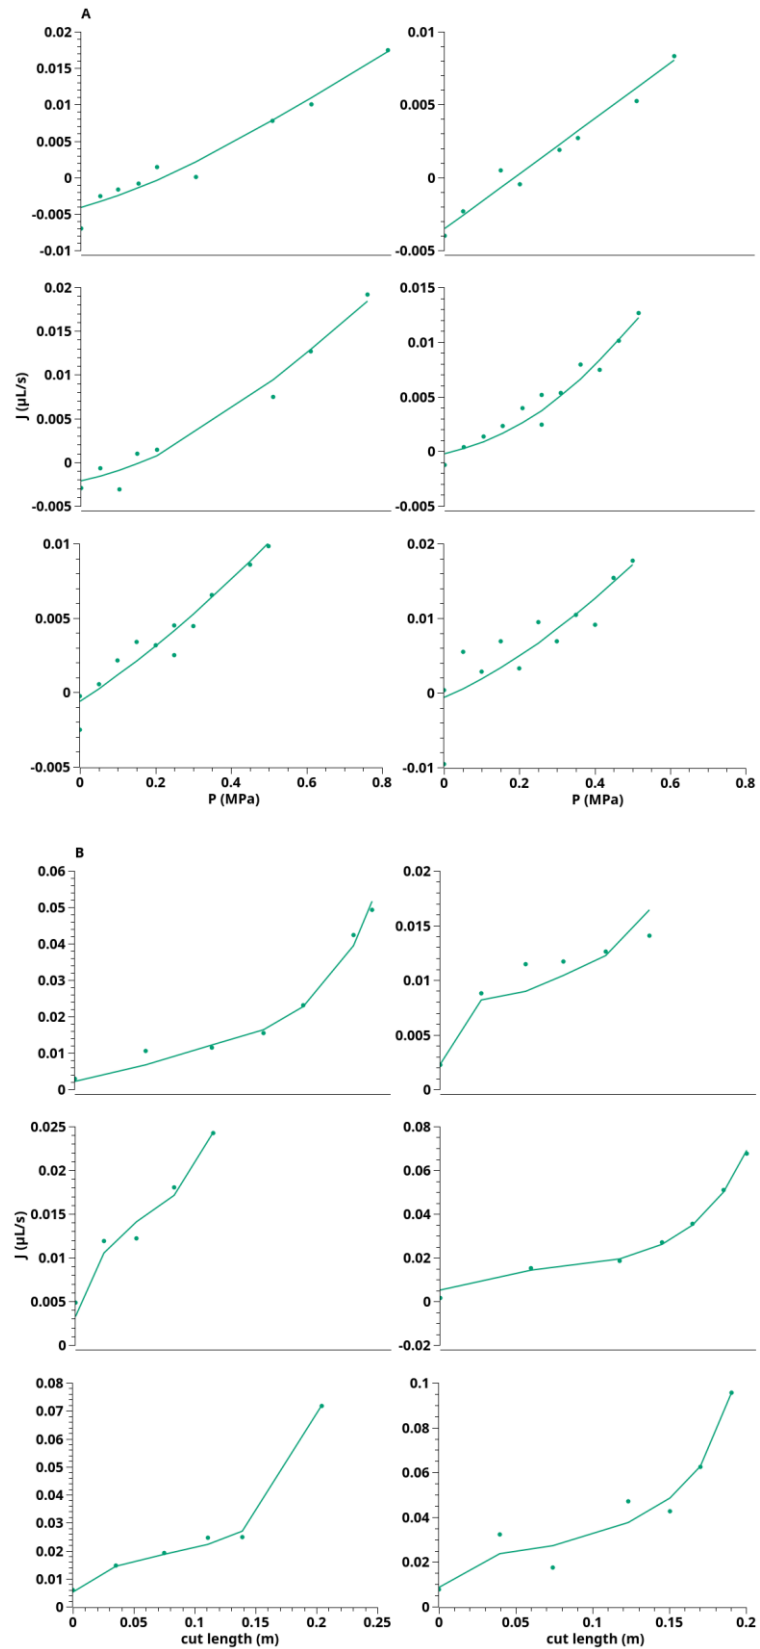

**Supplementary Fig. S2:** Experimental data and best fits in 6 individual PEG roots. (A)  $J_v(P)$ . (B) cut and flow. Dots represent experimental data, whereas solid curves indicate the best fit obtained with the model.

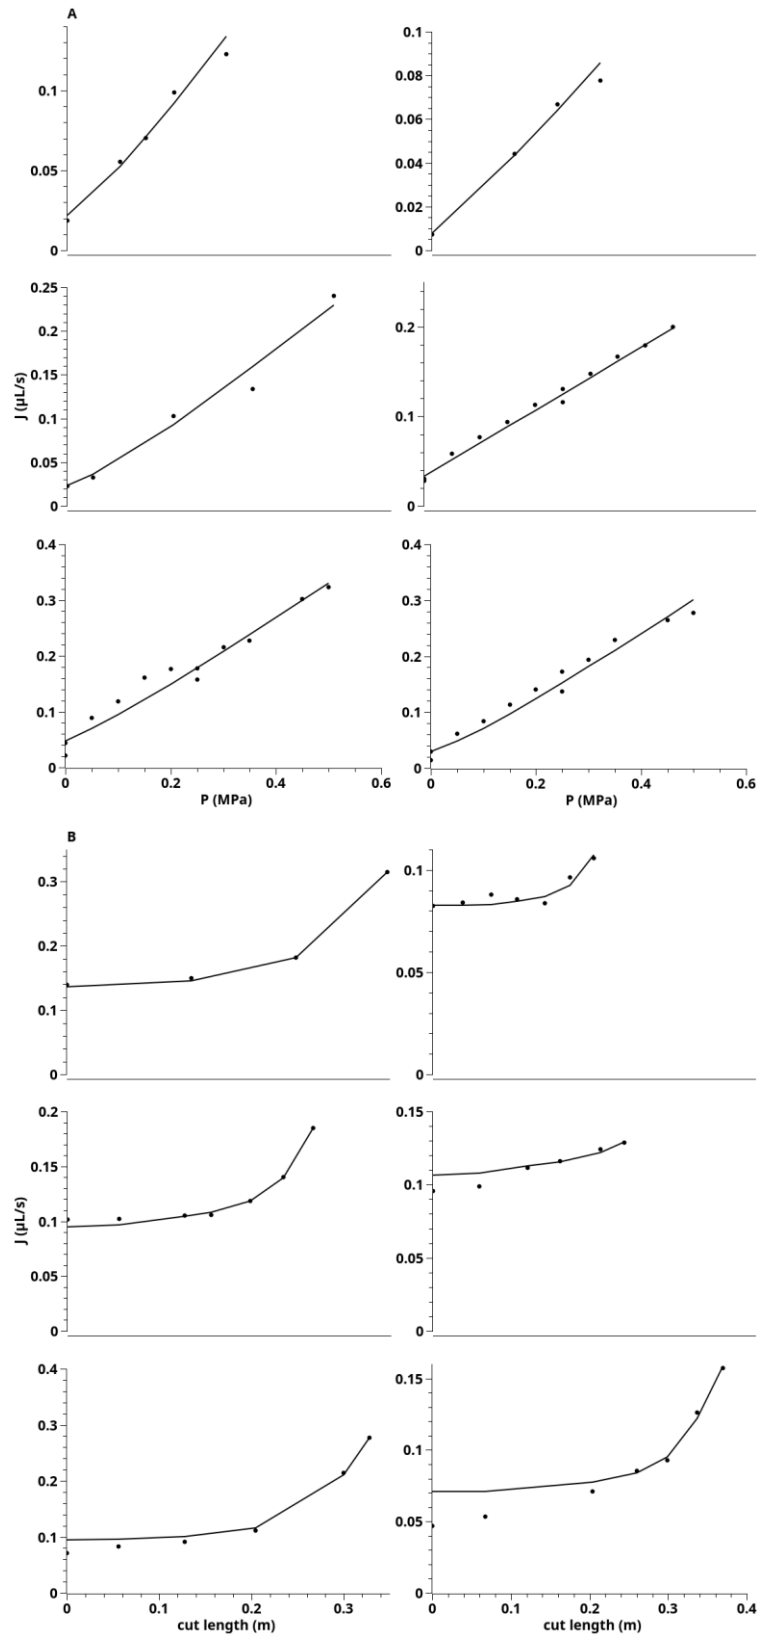

**Supplementary Fig. S3:** Experimental data and best fits in 6 individual CTR roots. (A)  $J_v(P)$ . (B) cut and flow. Dots represent experimental data, whereas solid curves indicate the best fit obtained with the model.

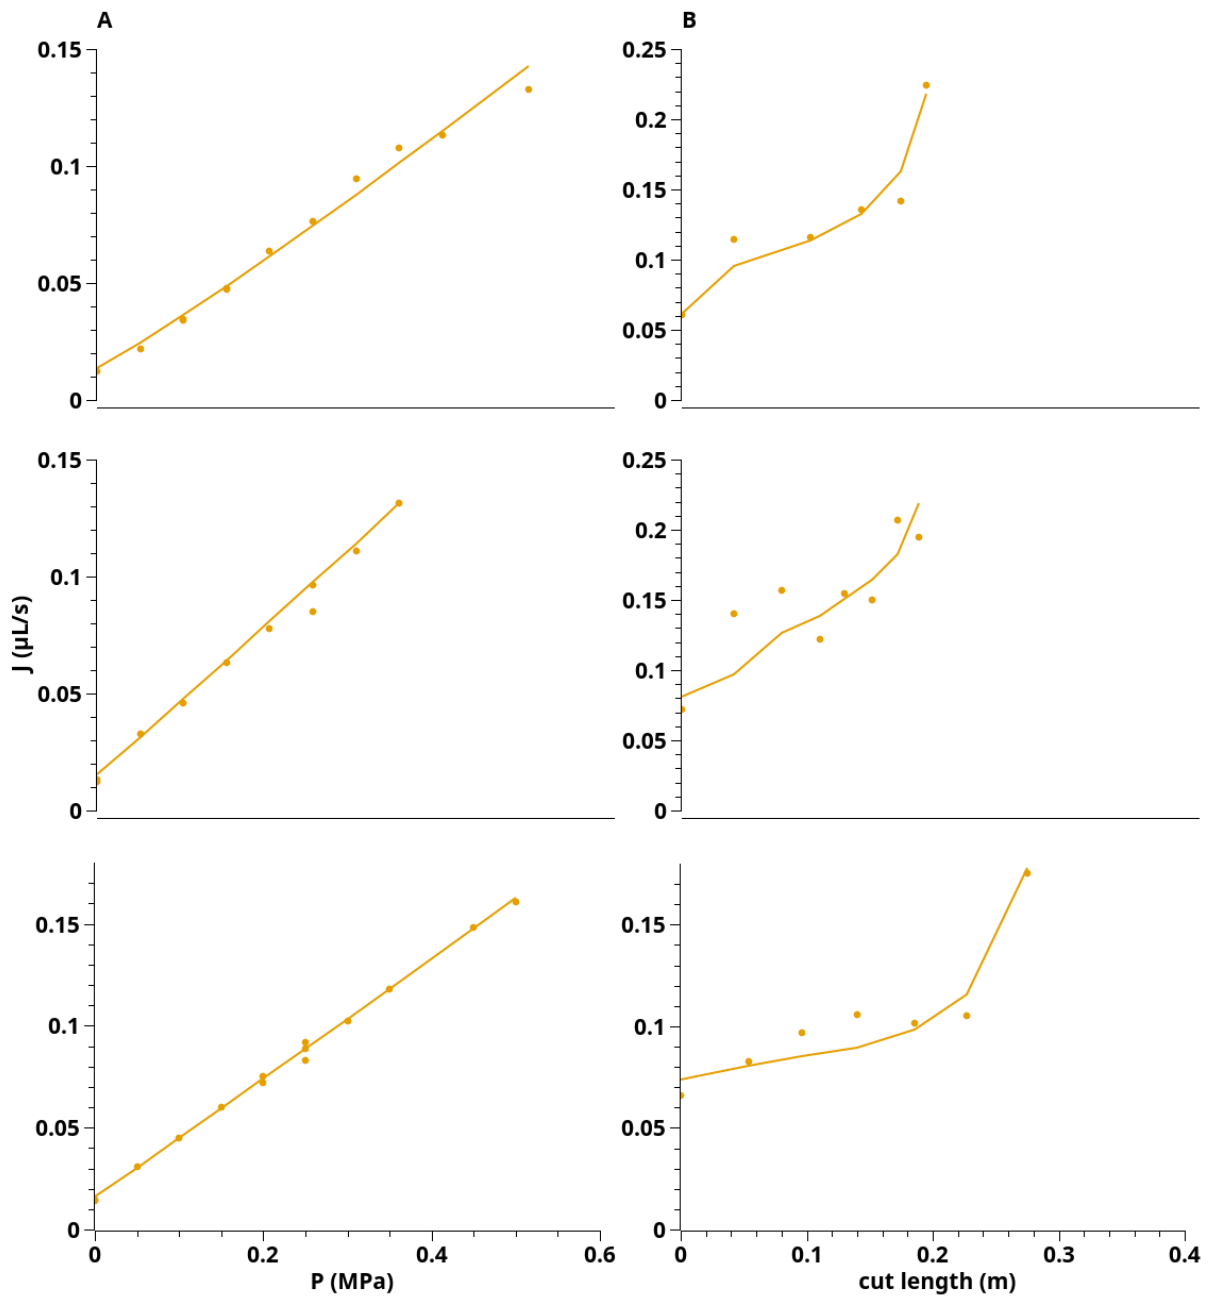

**Supplementary Fig. S4:** Experimental data and best fits in 3 individual PEG-CTR roots. (A)  $J_v(P)$ . (B) cut and flow. Dots represent experimental data, whereas solid curves indicate the best fit obtained with the model.

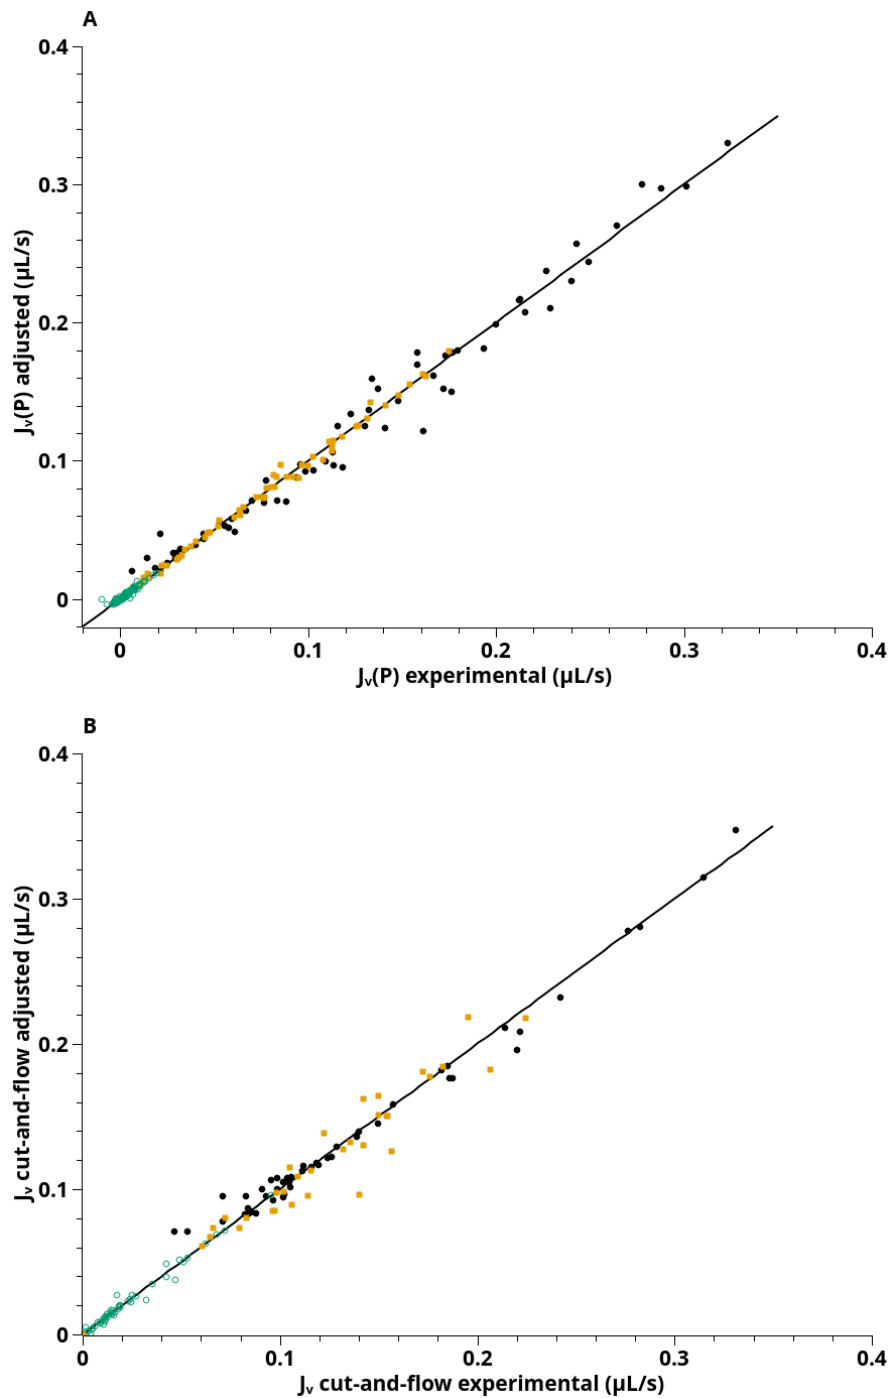

**Supplementary Fig. S5:** Plots of best fitted data obtained by model inversion versus experimental data. (A)  $J_v(P)$ . (B) cut-and-flow data. black closed circles: CTR roots; green open circles: PEG roots; orange closed squares: PEG-CTR roots. The black lines correspond to the perpendicular bisector:  $y=x$ .  $R^2$  values were as follows: (A) CTR:  $9.90 \cdot 10^{-1}$ , PEG:  $9.80 \cdot 10^{-1}$ , PEG-CTR:  $9.67 \cdot 10^{-1}$ ; (B) CTR:  $9.79 \cdot 10^{-1}$ , PEG:  $9.15 \cdot 10^{-1}$ , PEG-CTR:  $9.94 \cdot 10^{-1}$ .

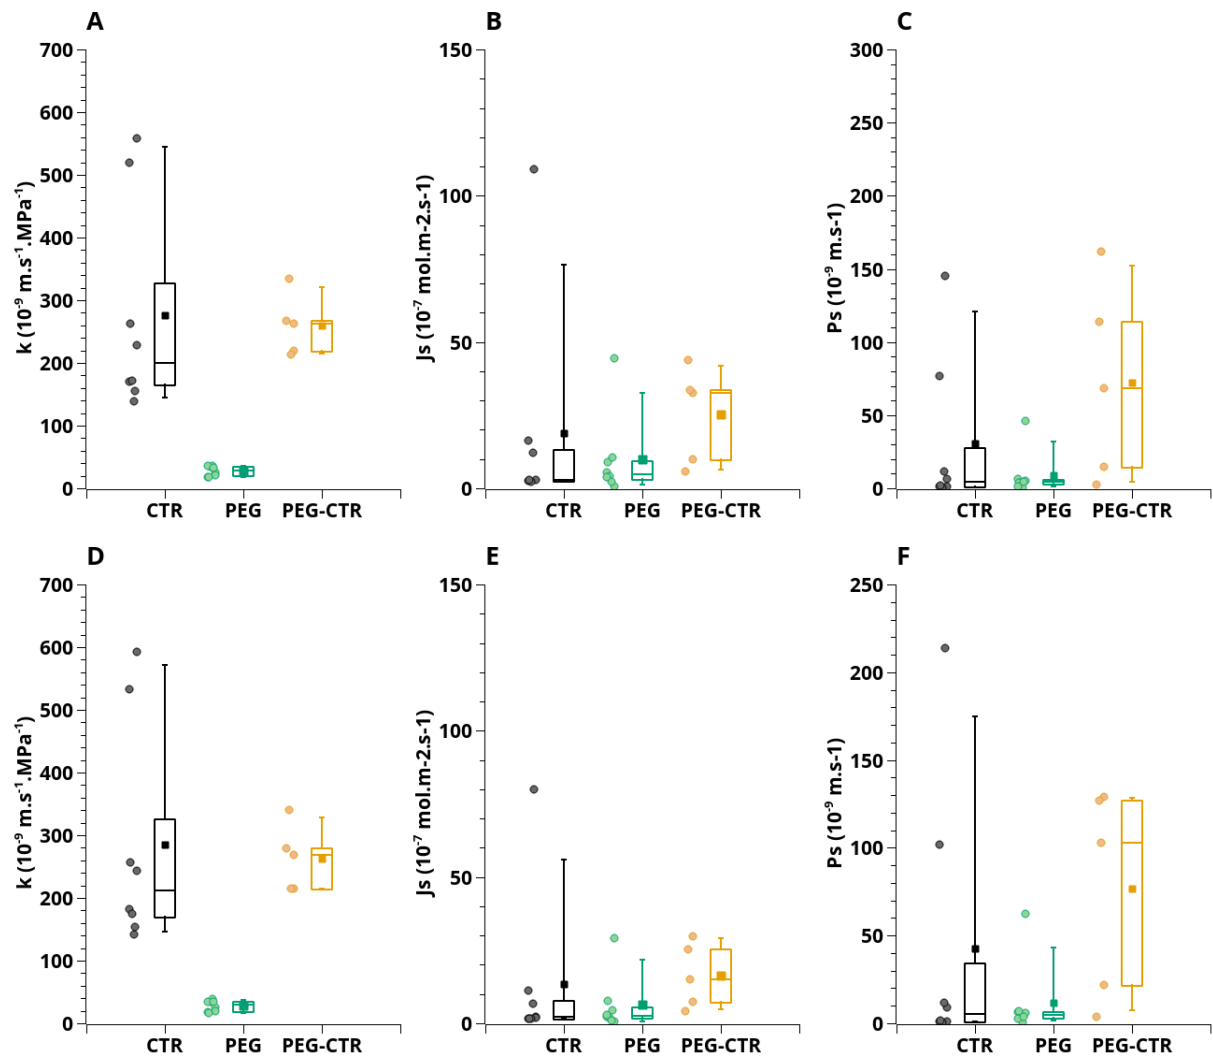

**Supplementary Fig. S6:** Water and solute transport parameters according to reflection coefficient value. (A-C)  $\sigma = 0.5$ ; (D-F)  $\sigma = 1$ . (A, D) radial hydraulic conductivity  $k$ . (B, E) radial solute flux  $J_s$ . (C, F) radial solute permeability  $P_s$ . Black, green and orange box plots and dots refer to CTR, PEG and PEG-CTR roots respectively.

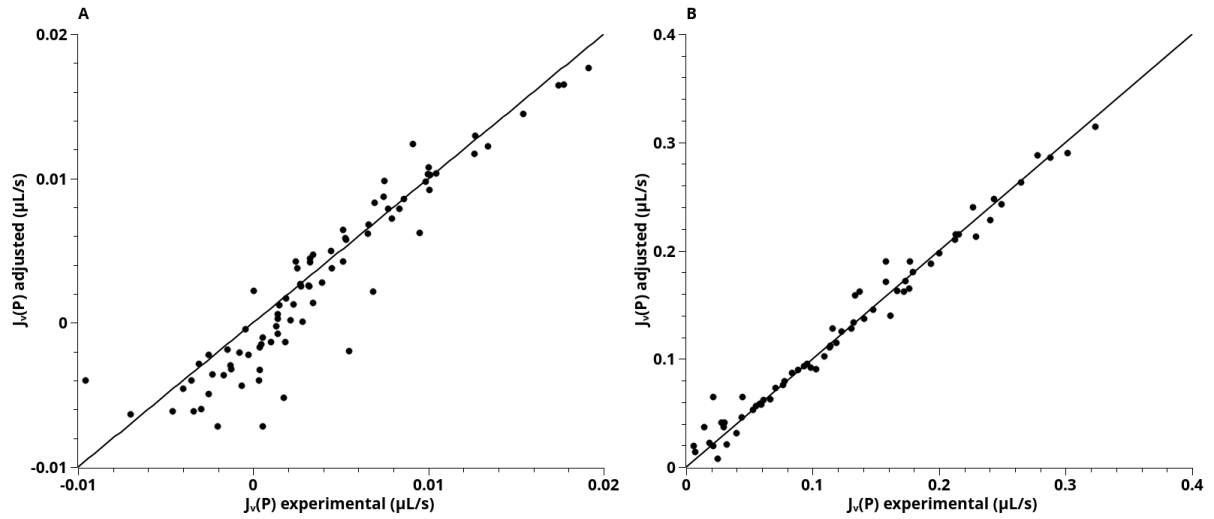

**Supplementary Fig. S7:** Plots of best fitted data obtained by inversion of a purely hydraulic model versus experimental data. (A) PEG roots. (B) CTR roots. Black closed circles: simulated vs experimental  $J_v(P)$  data. The black lines correspond to the perpendicular bisector:  $y=x$ .  $R^2$  values were as follows: (A)  $R^2 = 8.26 \cdot 10^{-1}$ ; (B)  $R^2 = 9.49 \cdot 10^{-1}$ .

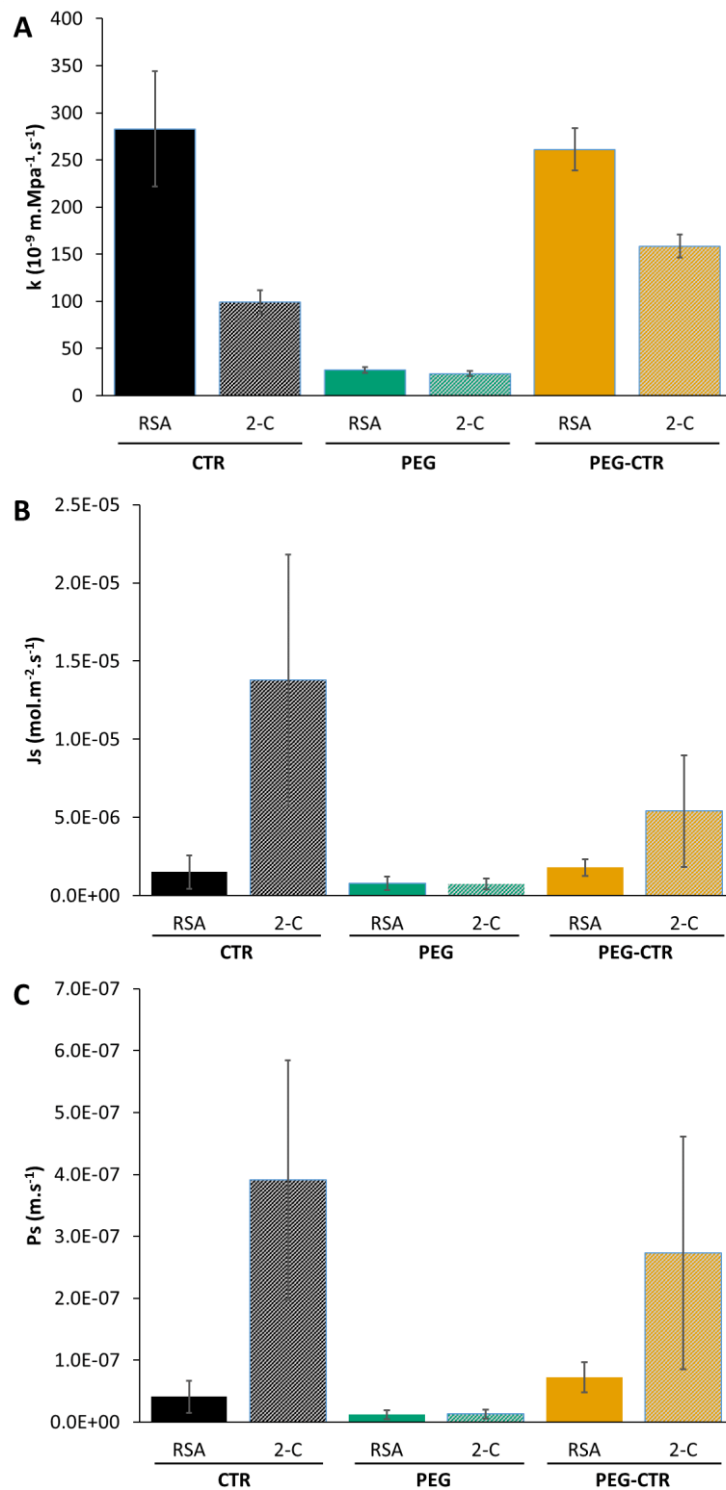

**Supplementary Fig. S8:** Comparison of parameter values adjusted using the RSA transport model (RSA, plain color) or a two-compartment model (2-C, hatched pattern). **(A)** radial conductivity  $k$  **(B)** solute uptake rate  $J_s^*$  **(C)** solute permeability  $P_s$ . Root types were as follows: CTR, black; PEG, green; PEG-CTR: orange. Error bars correspond to SE.



## Supplementary Protocols

### Supplementary Protocol S1

Discretization of the transport equations:

The root system architecture (RSA) is represented by a Multiscale Tree Graph (MTG) where the nodes are the discretized representation of representative elementary volumes (REV). In the following, REV are numbered from root base to tip.

In each REV, mass conservation is independently applied for water, solutes and PEG. This gives for a REV numbered  $i$ :

$$\begin{cases} J_i = \sum_j J_j + k_i [P_e - P_i - \pi_{\text{peg}}^{\text{ext}} + \pi_{\text{peg}_i} - \sigma RT(C_e - C_i)] S_i \\ J_i X_i = \sum_j J_j X_j + [J_s^* - P_s(C_i - C_e)] S_i \\ J_i X_{\text{peg}_i} = \sum_j J_j X_{\text{peg}_j} \end{cases} \quad (\text{A.1})$$

where  $P_e$ ,  $\pi_{\text{peg}}^{\text{ext}}$  and  $C_e$  are the hydrostatic pressure, the osmotic pressure due to the PEG and the solute concentration of the external medium, respectively. The variables with subscript  $i$  refer to the REV  $i$ :  $k_i$  is the radial hydraulic conductivity,  $P_i$  the sap hydrostatic pressure,  $\pi_{\text{peg}_i}$  the osmotic pressure corresponding to the local PEG concentration in sap ( $C_{\text{peg}_i}$ ),  $C_i$  the solute concentration in sap.  $S_i$  is the surface area of the REV.  $J_i$  is the outgoing xylem sap flow and  $J_j$  is the xylem sap flow coming from node  $j$ , which stands for one of the children of node  $i$ . This can be the next node on root axis, or any first node of a lateral root branched on node  $i$ .  $k_i$  is the radial conductivity.  $\sigma$  is the effective reflection coefficient,  $R$  the gas constant, and  $T$  the temperature.  $J_s^*$  is the solute active uptake rate and  $P_s$  is the radial permeability of the root peripheral tissues.  $J_i$  and  $J_j$  are proportional to the local pressure gradient as follows:

$$J_i = K_i \frac{(P_i - P_{i-1})}{l_i}$$

$$J_j = K_j \frac{(P_j - P_i)}{l_j}$$

with  $K$  being the axial conductance,  $l$  the REV length according to the subscript.

$X_i$  is the solute concentration according to the sap flow direction, with  $X_i = \theta_i C_i + (1 - \theta_i) C_{i-1}$ ,  $\theta_i$  being a factor that depends on flow direction:  $\theta_i = 1$  if  $P_i > P_{i-1}$  and  $\theta_i = 0$  if  $P_i < P_{i-1}$ .  $X_j$  is the solute concentration flowing between node  $i$  and its child  $j$ :  $X_j = \theta_j C_j + (1 - \theta_j) C_i$ , with  $\theta_j$  following the same rules as  $\theta_i$  according to  $(P_j - P_i)$ .  $X_{\text{peg}_i}$  is the same variable for the PEG concentration.

The third equation of system (A.1) expresses PEG mass conservation at node  $i$ .

The (A.1) system can be transformed as follows:

$$\begin{cases} G_{w_i} = J_i - \sum_j J_j - k_i [P_e - P_i - \pi_{peg}^{ext} + \pi_{peg_i} - \sigma RT(C_e - C_i)] S_i = 0 \\ G_{s_i} = J_i X_i - \sum_j J_j X_j - [J_s^* - P_s(C_i - C_e)] S_i = 0 \\ G_{peg_i} = J_i X_{peg_i} - \sum_j J_j X_{peg_j} = 0 \end{cases} \quad (A.2)$$

This system can be written in a matrix form as follows:

$$G(P_i, C_i, C_{peg_i}) = 0 \quad (A.3)$$

which can be resolved using a Newton-Raphson scheme.

Boundary conditions:

At the base, we consider a Dirichlet boundary condition for the pressure and Neumann boundary condition for the concentration:

$$\begin{aligned} P_1 &= P_{atm} \\ \frac{\partial C}{\partial x} &= 0 \end{aligned}$$

in other words, root base is at atmospheric pressure and solute and PEG concentrations at the outlet are the same as in the first node.

### Supplementary Protocol S2

According to Fiscus (Fiscus, 1975, 1977), we considered the root as a membrane separating two homogeneous compartments and wrote the following analytical solution. At steady-state, the outgoing solute flux equals the entering flux since there are no solute source or sink within the root. Thus, equation (4) yields:

$$\begin{aligned} JC &= J_s^* S + P_s(C_e - C)S \\ C &= \frac{J_s^* S + P_s C_e S}{J + P_s S} \end{aligned}$$

with  $J$  the water flow rate,  $S$  the total surface area of the root,  $J_s$  the solute active uptake rate,  $P_s$  the radial permeability of the root peripheral tissues,  $C$  and  $C_e$  the solute concentration in the xylem vessels and in the bathing solution, respectively.

Similarly, the entering water flux is equal to the outgoing flux due to mass balance (see equation (2)):

$$J = k(P_e - P - \pi_{peg}^{ext} - \sigma RT(C_e - C))S$$

with  $k$  the radial conductivity,  $\pi_{peg}^{ext}$  the osmotic pressure due to the PEG and  $P_e$  the hydrostatic pressure in the bathing solution, respectively.  $P$  is the hydrostatic pressure at the root basal extremity,  $\sigma$  the effective reflection coefficient,  $R$  the gas constant, and  $T$  the temperature.

Inserting the expression of  $C$  we obtain:

$$\begin{aligned}
 J^2 + J[P_s - k(P_e - P - \pi_{\text{peg}}^{\text{ext}} - \sigma RT C_e)]S \\
 - kS^2[(P_e - P - \pi_{\text{peg}}^{\text{ext}} - \sigma RT C_e)P_s + \sigma RT(J_s^* + P_s C_e)] = 0
 \end{aligned}
 \tag{B.1}$$

### Literature cited

- Fiscus EL.** 1975. The Interaction between Osmotic- and Pressure-Induced Water Flow in Plant Roots. *Plant Physiology* **55**, 917–922.
- Fiscus EL.** 1977. Determination of Hydraulic and Osmotic Properties of Soybean Root Systems. *Plant Physiology* **59**, 1013-1020.
- Gonzalez-Tello P, Camacho F, Blazquez G.** 1994. Density and Viscosity of Concentrated Aqueous Solutions of Polyethylene Glycol. *Journal of Chemical & Engineering Data* **39**, 611-614.
